# Real-time estimation of $R_0$ for supporting public-health policies against COVID-19

Sebastián Contreras<sup>a</sup>, H. Andrés Villavicencio, David Medina-Ortiz<sup>a,d</sup>, Claudia P. Saavedra<sup>c,\*\*</sup>, Álvaro Olivera-Nappa<sup>b,a,\*</sup>

<sup>a</sup>Centre for Biotechnology and Bioengineering (CeBiB), Universidad de Chile, Beauchef 851, 8370448 Santiago, Chile.

<sup>b</sup>Department of Chemical Engineering, Biotechnology and Materials, Universidad de Chile, Beauchef 851, 8370448 Santiago, Chile.

<sup>c</sup>Laboratorio de Micobiología Molecular, Facultad de Ciencias de la Vida, Universidad Andres Bello, Santiago, Chile

<sup>d</sup>Division of Chemistry and Chemical Engineering, California Institute of Technology, Pasadena, CA 91125, USA

---

## Abstract

**Background:** In the absence of a consensus protocol to slow down the current SARS- CoV2 spread, policy makers are in need of real-time indicators to support decisions in public health matters. The Basic Reproduction Number ( $R_0$ ) represents viral spread rate and can be dramatically modified by the application of effective public control measures. However, current methodologies to calculate  $R_0$  from data remain cumbersome and unusable during an outbreak. **Objective:** To provide a simple mathematical formulation for obtaining  $R_0$  in Real-Time, and apply it to assess the effectiveness of public-health policies in different iconic countries. **Study design:** By modifying the equations describing the spread of the virus, we derived a real-time  $R_0$  estimator that can be readily calculated from daily official case reports. **Results:** We show the application of a time trend analysis of the  $R_0$  estimator to assess the efficacy and promptness of public health measures that impacted on the development of the COVID-19 epidemic in iconic countries. **Conclusions:** We propose our simple estimator and method as useful tools to follow and assess in real time the effectiveness of public health policies on COVID-19 evolution.

**Keywords:** COVID-19, SARS-CoV2, basic reproduction number  $R_0$ , public-health policies, epidemiologic modelling

---

## 1. Background

Several mathematical models have been proposed in recent weeks to fit public databases on the SARS-CoV2 outbreak (Chen et al., 2020; Simha et al., 2020; Calafiore et al., 2020; Yang et al., 2020). Despite their particularities, most of them have the structure of the well-known SIR model proposed by Kermack and McKendrick (1927). Besides the interest in modeling the spread of this virus, there is a need for indexes

---

\*Corresponding author

\*\*Member of the emergency committee for the COVID-19 outbreak in Chile

Email address: aolivera@ing.uchile.cl (Álvaro Olivera-Nappa)

30 to evaluate the efforts made to prevent new cases and assess how likely a particular demographic group is  
 31 to be infected. One of the parameters used for that means is the Basic Reproduction Number  $R_0$ , which  
 32 value represents the number of persons a single infected individual might infect (Perasso, 2018). From its  
 33 definition,  $R_0 \geq 1$  indicate the outbreak might have an exponential growth, while  $R_0 < 1$  would account for  
 34 a disappearing infection. An intuition on how it works is presented on Figure 1.

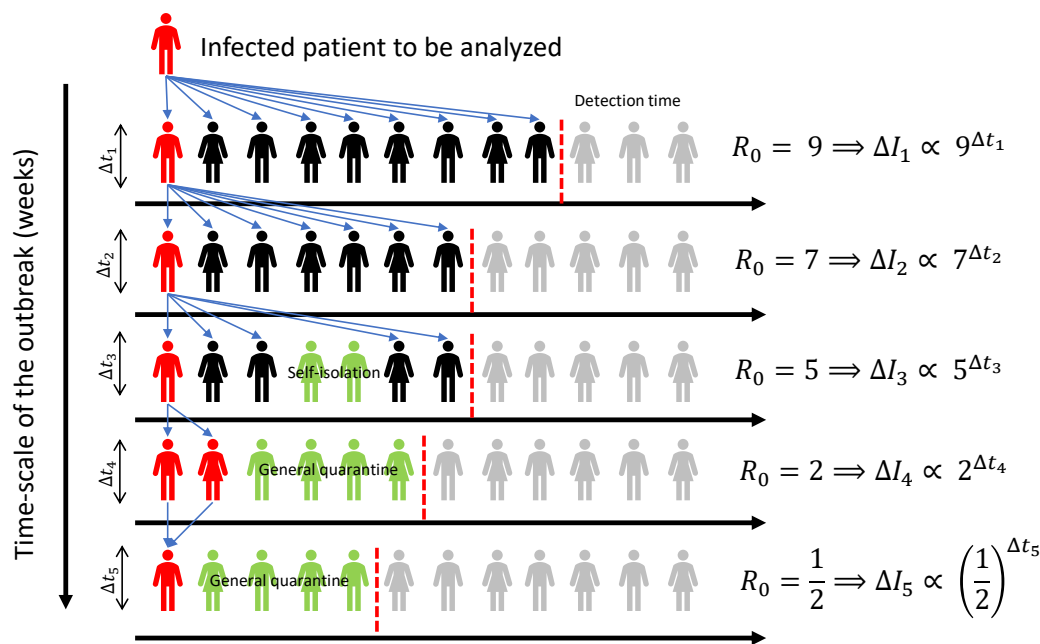

Figure 1: Different stages can be identified during the outbreak of an infection, characterized by the number of people that a single infected individual may infect ( $R_0$ ). In the figure, a single infected individual (in red) can spread the virus among different individuals (in black), not reaching part of the population (in gray). Some individuals go into isolation (in green), effectively lowering their contagion chance. At the right-hand side of the plot,  $R_0$  represents the number of possible new infections caused by a single patient in each outbreak stage. In the first days of the outbreak, a single individual can infect several people before isolation, but as the amount of cases gets public awareness, health policies restricting movement and self-driven actions may help to control the outbreak, which is effectively captured by a decreasing  $R_0$ .

35 Even though several authors have claimed to have provided guidelines for its calculation (Heesterbeek,  
 36 2002; Delamater et al., 2019; Breban et al., 2007; Perasso, 2018), the truth is that it remains uncertain,  
 37 especially for non-specific public. The formulations presented in literature make the calculation of  $R_0$   
 38 nearly impossible for those untrained in mathematical modeling and inverse problems, both because of their  
 39 complexity and the lack of a general procedure to follow. Then, its objective is not fulfilled, as the different  
 40 decision-making actors could not use it for evaluating the different actions taken by the different public  
 41 health plans.

## 42 2. Objectives

43 In the present work, we propose a useful and simple methodology to calculate  $R_0$  directly from available  
44 epidemiological data in real time during an outbreak. The key feature of this practical methodology is that  
45 no specific knowledge in mathematics or scientific computation is needed to generate estimations of this  
46 parameter, thus being particularly handy for its use for day-to-day assessment in public health matters. As  
47 our methodology does not involve a parameter fitting stage, which would be needed if solving the SIR system  
48 numerically to represent continuous trends, we can use it to evaluate the immediate impact of the different  
49 actions used to prevent the spread of SARS-CoV2. In a case of study, we assess the effect on  $R_0$  of the  
50 different ongoing measures taken by the Chilean government, and we compare their result with the current  
51 panorama of different iconic countries.

## 52 3. Results

53 Assuming the outbreak follows approximately an SIR model (equations 1-3), susceptible, infected and  
54 recovered patient dynamics are represented by:

$$S' = -\frac{\beta SI}{N}, \quad (1)$$

$$I' = \frac{\beta SI}{N} - \gamma I, \quad (2)$$

$$R' = \gamma I. \quad (3)$$

55 In terms of the parameters of the SIR model, we can calculate  $R_0$  as the ratio between the infection rate  
56  $\beta$  and recuperation  $\gamma$  (Heesterbeek, 2002):

$$R_0 = \frac{\beta}{\gamma}. \quad (4)$$

57 In particular, equations 1 and 2 can be combined applying the chain rule and the derivative of the inverse  
58 function theorem, so we can write:

$$\frac{dI}{dS} = \frac{\frac{\beta SI}{N} - \gamma I}{-\frac{\beta SI}{N}} \iff \frac{dI}{dS} = -1 + \frac{\gamma N}{\beta S}. \quad (5)$$

59 Using the definition of  $R_0$  given by equation 4,  $\frac{\gamma}{\beta} = \frac{1}{R_0}$ . Assuming that all persons are initially  
60 susceptible and a low percentage of the population is infected when data is taken, we may safely assume  
61  $\frac{S}{N} \approx 1$ . Therefore, equation 5 can be re-written as

$$\frac{dI}{dS} = -1 + \frac{1}{R_0}. \quad (6)$$

62 Equation 6 can be discretized in an interval  $[t_{i-1}, t_i]$  where we can assume that  $R_0(t) = R_0(t_i)$  is constant:

$$R_0(t_i) = \frac{1}{\frac{\Delta_i I}{\Delta_i S} + 1}. \quad (7)$$

63 Extending the classical SIR model to consider also deaths, a population balance dictates the discrete  
64 differences to follow  $\Delta_i S + \Delta_i I + \Delta_i R + \Delta_i D = 0$ . Then, equation 7 takes its final form.

$$R_0(t_i) = \frac{1}{1 - \frac{\Delta_i I}{\Delta_i I + \Delta_i R + \Delta_i D}} \iff R_0(t_i) = \frac{\Delta_i I}{\Delta_i R + \Delta_i D} + 1. \quad (8)$$

65 Equation 8 stands in front of other methods because of its simplicity and usability, as there is no need  
66 for specific mathematical or scientific computing knowledge for obtaining realistic values of  $R_0$  for a given  
67 population during an epidemic or pandemic outbreak. However, due to the nature of its dependence on  
68 real-time data, uncertainties on the input values would have a significant effect on the outcome. Since most  
69 common uncertainties are related to the time frame between contagion, sampling, detection and report (time  
70 misclassification), we suggest applying moving averages to smooth trends and using only official data sources  
71 to consistently estimate  $R_0$ .

## 72 4. Discussion

### 73 *Effect of quarantine measures on the COVID-19 outbreak in Chile and the current world context*

74 Figure 2 shows the values of  $R_0$  for different countries plotted against time. Countries that have successfully  
75 controlled the epidemics currently show  $R_0$  values consistently lower than 1. China, where the COVID-19  
76 pandemics started and is currently under control, shows a slight increase in the last week, which could  
77 indicate a new risk factor to be evaluated, such as the presence of a new contagion peak. Other countries  
78 currently show lower  $R_0$  values, which may represent better public health managements, with the exception  
79 of the current situation in the USA. However, the analysis is much clearer when the  $R_0$  values of all countries  
80 are plotted from the day when the first COVID-19 case was reported. In this plot (Figure 2), different  
81 control strategies may be straightfully compared. Countries that acted quickly to control viral spread can be  
82 recognized by an earlier decrease of their  $R_0$  indexes. The comparative efficacy of control measures can be  
83 assessed by the magnitude of the negative slope of the curves. China and Spain reacted at approximately  
84 the same time after the first case, but the slope magnitudes of the Chinese plot are noticeably higher and  
85  $R_0$  reaches values below 1 earlier than Spain, and in this last country the contagion rate is not controlled  
86 yet. South Korea and Germany controlled the COVID-19 outbreak more or less at the same time, but at

87 much higher rates in the South Korean case, which could reflect different control rate efficiencies of control  
 88 measures applied in both countries. The differences between Italian and Spanish control policies are also  
 89 evident, as well as the worsening observed in Italian trends.

90 Using the public database on the SARS-CoV2 outbreak in Chile, provided by the Chilean Health Ministry  
 91 (MINSAL, 2020a), we studied the numbers up to date (MINSAL, 2020b), and contrasted them to those  
 92 of countries that have adopted different strategies to control the outbreak. From March 27, the Chilean  
 93 government declared a partial quarantine for highly affected municipalities in Santiago and other cities (with  
 94 42% of the national population and 50% of confirmed cases). Considering an incubation time of 5 days  
 95 (MINSAL, 2020a), from April 1st on the effects of this quarantine on the SARS-CoV2 spread in Chile can be  
 96 observed as a decreasing trend in  $R_0$ , quickly approaching the control threshold. Up-to-date, both the early  
 97 onset and high slopes seem to indicate a good effect of the Chilean public-health management policies.

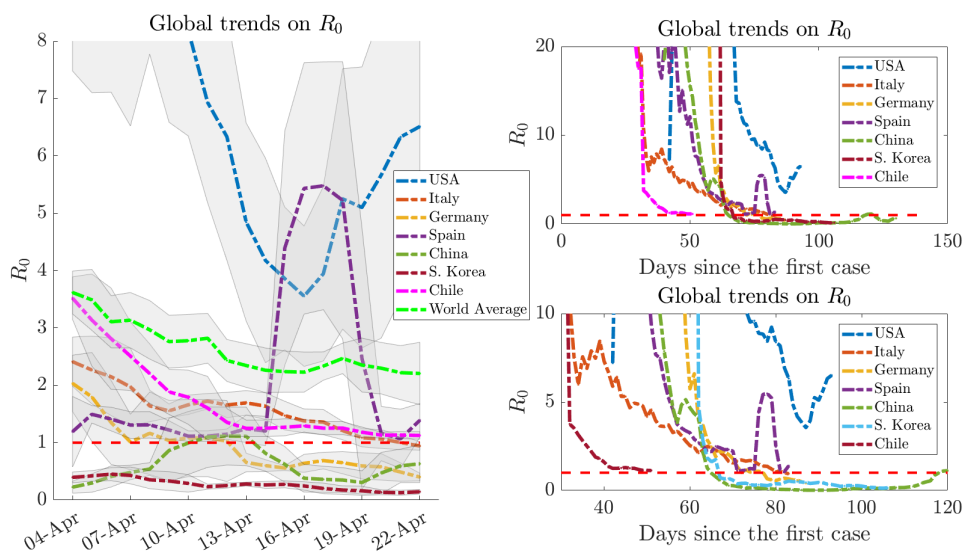

Figure 2: Comparative analysis of the values of  $R_0$  for different countries, using a moving average window of  $\pm 2$  days. The control threshold is represented by a horizontal red dashed line ( $R_0 = 1$ ). The plot on the left shows daily trends from March 25 to April 22. The right-hand charts show the same data plotted from the day of detection of the first case, in two different time frames. Official data from Worldometers.info (16 April, 2020). Files with the data and calculations are available on request.

98 **5. Conclusions**

99 We have developed a fast and accurate methodology to calculate the Basic Reproduction Number  $R_0$   
 100 directly from raw real-time data of an evolving epidemic outbreak. Our results have also shown that this  
 101 index can be a useful decision parameter to evaluate the impact of public policies in the control of the  
 102 outbreak of COVID-19. The simplicity of the proposed approach to calculate  $R_0$  (equation 8) remarks its

103 applicability, and our analysis of  $R_0$  trends in different countries during the current SARS-CoV2 outbreak  
104 highlights how it can be applied to assess both the speed of reaction and the efficacy of public-health measures.  
105 This provides decision-makers with a simple and easily calculable tool to timely understand the impact of  
106 their policies. As the proposed equation does not need vast volumes of data, it results particularly handy for  
107 its use when data resolution is not high enough to fit continuous models, in the analysis of short-time trends,  
108 or to compare different regions in the world or even inside a single country with different time density of data.  
109 As varied as the uses for the proposed methodology are the opportunities to improve it. We look forward to  
110 seeing how this contribution of a real-time estimator of  $R_0$  would impact the way we analyze the ongoing  
111 contingency and how the scientific and decision-making community would adapt it to tailor propagation  
112 models and obtain better and timely insights on the application of emergency public-health policies.

### 113 **Conflict of Interest Statement**

114 The authors declare that the research was conducted in the absence of any commercial or financial  
115 relationships that could be construed as a potential conflict of interest.

### 116 **Author Contributions**

117 Conceptualization, SC, DM-O, HAV; methodology, SC, DM-O, HAV; validation AO-N, SC, CS; investiga-  
118 tion, SC, HAV, DM-O; writing, review and editing, SC, DM-O, HAV, AO-N; supervision, AO-N, CS; project  
119 administration, AO-N, CS; funding resources, AO-N.

### 120 **Acknowledgements**

121 The authors gratefully acknowledge support from the Centre for Biotechnology and Bioengineering -  
122 CeBiB (PIA project FB0001, Conicyt, Chile). DM-O gratefully acknowledges Conicyt, Chile, for PhD  
123 fellowship 21181435.

### 124 **References**

- 125 Breban, R., Vardavas, R., Blower, S., 2007. Theory versus data: how to calculate  $r_0$ ? PLoS One 2.  
126 Calafiore, G.C., Novara, C., Possieri, C., 2020. A modified sir model for the covid-19 contagion in italy. arXiv preprint  
127 arXiv:2003.14391 .  
128 Chen, Y.C., Lu, P.E., Chang, C.S., 2020. A time-dependent sir model for covid-19. arXiv preprint arXiv:2003.00122 .  
129 Delamater, P.L., Street, E.J., Leslie, T.F., Yang, Y.T., Jacobsen, K.H., 2019. Complexity of the basic reproduction number ( $r_0$ ).  
130 Emerging infectious diseases 25, 1.  
131 Heesterbeek, J.A.P., 2002. A brief history of  $r_0$  and a recipe for its calculation. Acta biotheoretica 50, 189–204.  
132 Kermack, W.O., McKendrick, A.G., 1927. A contribution to the mathematical theory of epidemics. Proceedings of the royal  
133 society of london. Series A, Containing papers of a mathematical and physical character 115, 700–721.

- 134 MINSAL, 2020a. Official numbers for the coronavirus outbreak in chile. <https://www.gob.cl/coronavirus/cifrasoficiales/>.  
135 Accessed: 2020-04-23.
- 136 MINSAL, 2020b. Reporte Coronavirus 23/04/2020. Technical Report. Ministerio de Salud, Chile.
- 137 Perasso, A., 2018. An introduction to the basic reproduction number in mathematical epidemiology. *ESAIM: Proceedings and*  
138 *Surveys* 62, 123–138.
- 139 Simha, A., Prasad, R.V., Narayana, S., 2020. A simple stochastic sir model for covid 19 infection dynamics for karnataka:  
140 Learning from europe. arXiv preprint arXiv:2003.11920 .
- 141 Worldometers.info, 16 April, 2020. Official numbers for the coronavirus outbreak in chile. [https://www.worldometers.info/](https://www.worldometers.info/coronavirus/)  
142 [coronavirus/](https://www.worldometers.info/coronavirus/). Accessed: 2020-04-23.
- 143 Yang, Z., Zeng, Z., Wang, K., Wong, S.S., Liang, W., Zanin, M., Liu, P., Cao, X., Gao, Z., Mai, Z., et al., 2020. Modified seir  
144 and ai prediction of the epidemics trend of covid-19 in china under public health interventions. *Journal of Thoracic Disease*  
145 12, 165.

Time-scale of the outbreak (weeks)

Infected patient to be analyzed

Detection time

$\Delta t_1$

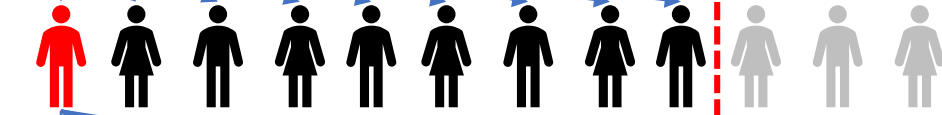

$$R_0 = 9 \Rightarrow \Delta I_1 \propto 9^{\Delta t_1}$$

$\Delta t_2$

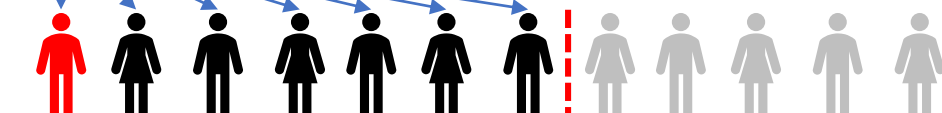

$$R_0 = 7 \Rightarrow \Delta I_2 \propto 7^{\Delta t_2}$$

$\Delta t_3$

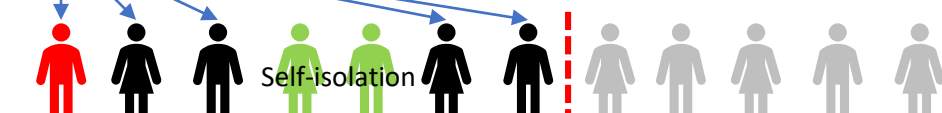

$$R_0 = 5 \Rightarrow \Delta I_3 \propto 5^{\Delta t_3}$$

$\Delta t_4$

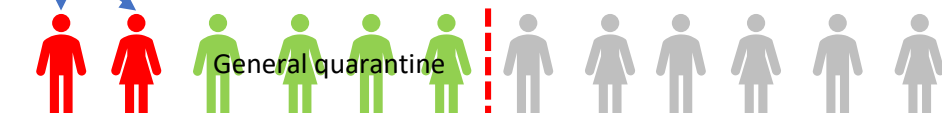

$$R_0 = 2 \Rightarrow \Delta I_4 \propto 2^{\Delta t_4}$$

$\Delta t_5$

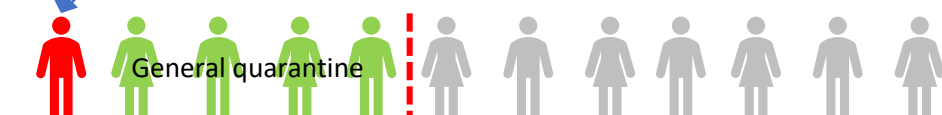

$$R_0 = \frac{1}{2} \Rightarrow \Delta I_5 \propto \left(\frac{1}{2}\right)^{\Delta t_5}$$



Global trends on  $R_0$ 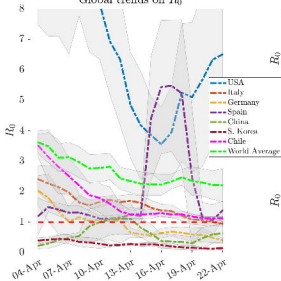Global trends on  $R_0$ 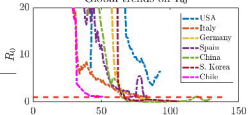

Days since the first case

Global trends on  $R_0$ 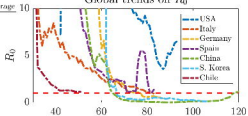

Days since the first case
